# Supplementary material for: Green Nanochemistry: Argyreia Nervosa-Assisted Synthesis of Cu-Ag Bimetallic Nanoparticles with Enhanced Antibacterial Properties
Source: Research Square preprint supplement (doi:10.21203/rs.3.rs-3628579/v1), 2023-11-25
Supplement: Supplementary file 1 [file c70e84af32efa6bfa664d9e9.docx]

Title: **Green Nanochemistry: Argyreia Nervosa-Assisted Synthesis of Cu-Ag Bimetallic Nanoparticles with Enhanced Antibacterial Properties**


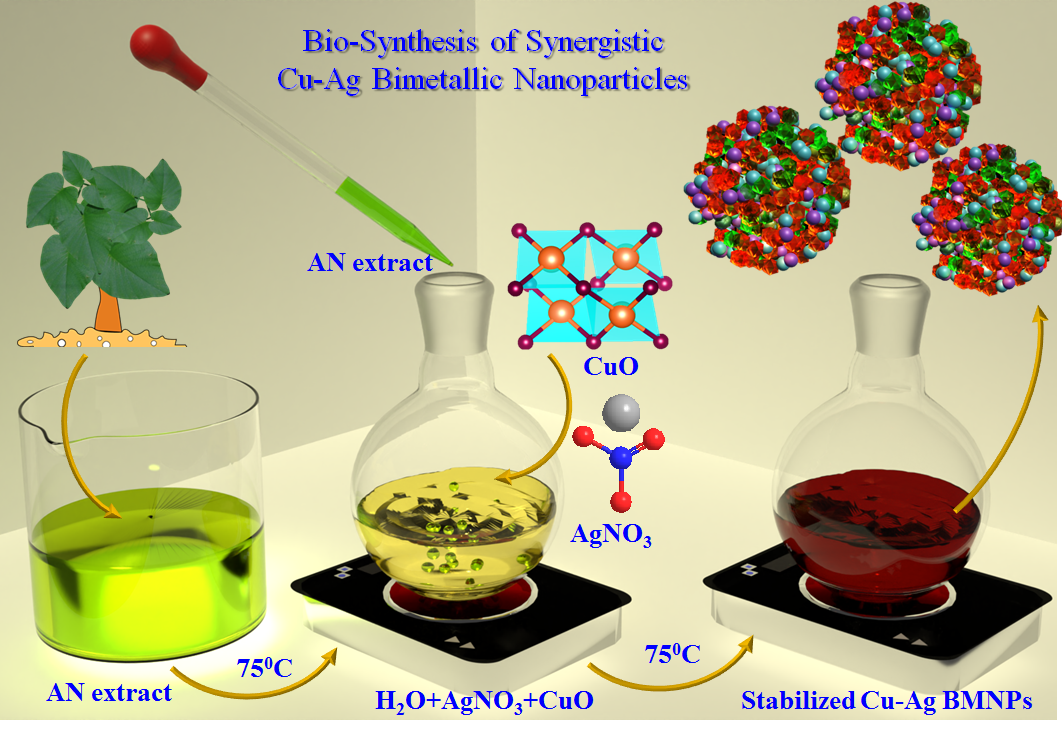


***Novelty:***

The most important aspect of this research project is the role of the Argyreia Nervosa plant leaf extract in improving and enhancing the antibacterial activity of the Cu-Ag BMNPs. This underscores the novel synergy between plant extracts and nano-materials for practical applications. Also, this study's novelty arises from its innovative approach to biosynthesis, the pivotal role of AN plant leaf extract, and the potential for addressing real-world challenges related to bacterial infections and resistance. The enhanced antibacterial properties brought about by this unique synergy have far-reaching implications in diverse applications and underscore the potential of bimetallic nanoparticles in nano-biotechnology.
